# Supplementary material for: Chebulic Acid Prevents Methylglyoxal-Induced Mitochondrial Dysfunction in INS-1 Pancreatic β-Cells
Source: MDPI journal article supplement (doi:10.3390/antiox9090771), 2020-08-20

### Supplementary material

**Figure S1.** Effect of NAC pretreatment for 48 h on the MG-induced ROS production in INS-1 cells incubated with 2.0 mM MG for 8 h. Values are presented as mean  $\pm$  SD (n=3) and different letters mean significant differences at  $p < 0.05$ .

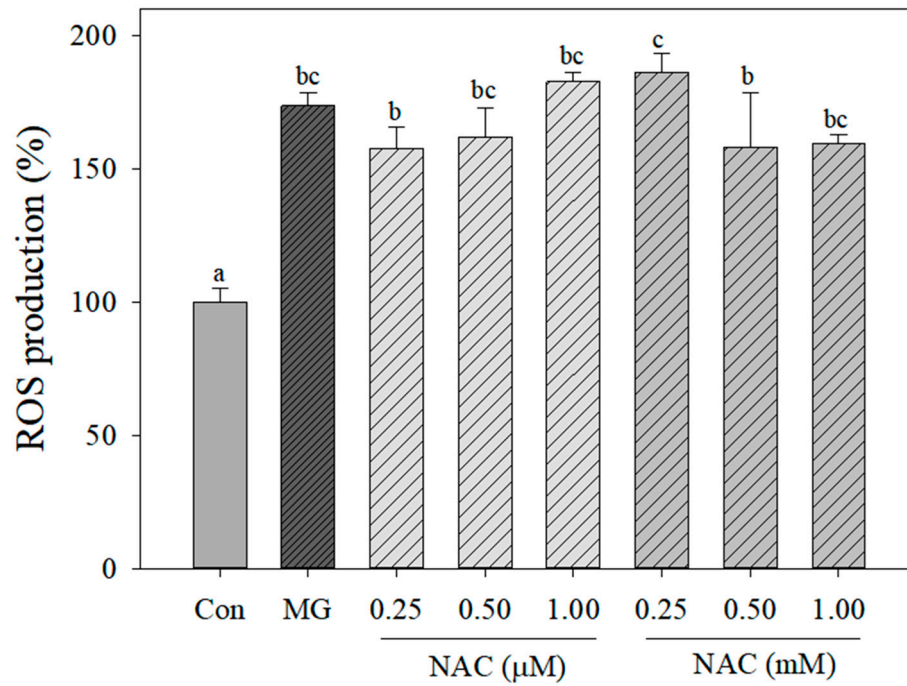

Supplement: s1 [file s1]
